# Supplementary material for: Mechanisms for the anti-obesity actions of bofutsushosan in high-fat diet-fed obese mice
Source: PubMed Central journal article supplement (PMC5369197; doi:10.1186/s13020-017-0129-x), 2017-03-27
Supplement: 13020_2017_129_MOESM3_ESM.pdf [file 13020_2017_129_MOESM3_ESM.pdf]

Data of Fig. 1

| Day    | 15minコンクリート | 1日    | 1週間   | 1ヶ月   |
|--------|-------------|-------|-------|-------|
| 0.25   | -4.51       | -1.55 | -1.32 | -1.32 |
| 0.50   | -1.42       | -1.26 | -1.14 | -1.14 |
| 1.00   | -1.39       | -1.48 | -1.49 | -1.49 |
| 1.50   | -1.36       | -1.46 | -1.47 | -1.47 |
| 2.00   | -1.34       | -1.45 | -1.46 | -1.46 |
| 3.00   | -1.31       | -1.43 | -1.43 | -1.43 |
| 4.00   | -1.28       | -1.40 | -1.40 | -1.40 |
| 5.00   | -1.25       | -1.37 | -1.37 | -1.37 |
| 6.00   | -1.22       | -1.34 | -1.34 | -1.34 |
| 7.00   | -1.19       | -1.31 | -1.31 | -1.31 |
| 8.00   | -1.16       | -1.28 | -1.28 | -1.28 |
| 9.00   | -1.13       | -1.25 | -1.25 | -1.25 |
| 10.00  | -1.10       | -1.22 | -1.22 | -1.22 |
| 11.00  | -1.07       | -1.19 | -1.19 | -1.19 |
| 12.00  | -1.04       | -1.16 | -1.16 | -1.16 |
| 13.00  | -1.01       | -1.13 | -1.13 | -1.13 |
| 14.00  | -0.98       | -1.10 | -1.10 | -1.10 |
| 15.00  | -0.95       | -1.07 | -1.07 | -1.07 |
| 16.00  | -0.92       | -1.04 | -1.04 | -1.04 |
| 17.00  | -0.89       | -1.01 | -1.01 | -1.01 |
| 18.00  | -0.86       | -0.98 | -0.98 | -0.98 |
| 19.00  | -0.83       | -0.95 | -0.95 | -0.95 |
| 20.00  | -0.80       | -0.92 | -0.92 | -0.92 |
| 21.00  | -0.77       | -0.89 | -0.89 | -0.89 |
| 22.00  | -0.74       | -0.86 | -0.86 | -0.86 |
| 23.00  | -0.71       | -0.83 | -0.83 | -0.83 |
| 24.00  | -0.68       | -0.80 | -0.80 | -0.80 |
| 25.00  | -0.65       | -0.77 | -0.77 | -0.77 |
| 26.00  | -0.62       | -0.74 | -0.74 | -0.74 |
| 27.00  | -0.59       | -0.71 | -0.71 | -0.71 |
| 28.00  | -0.56       | -0.68 | -0.68 | -0.68 |
| 29.00  | -0.53       | -0.65 | -0.65 | -0.65 |
| 30.00  | -0.50       | -0.62 | -0.62 | -0.62 |
| 31.00  | -0.47       | -0.59 | -0.59 | -0.59 |
| 32.00  | -0.44       | -0.56 | -0.56 | -0.56 |
| 33.00  | -0.41       | -0.53 | -0.53 | -0.53 |
| 34.00  | -0.38       | -0.50 | -0.50 | -0.50 |
| 35.00  | -0.35       | -0.47 | -0.47 | -0.47 |
| 36.00  | -0.32       | -0.44 | -0.44 | -0.44 |
| 37.00  | -0.29       | -0.41 | -0.41 | -0.41 |
| 38.00  | -0.26       | -0.38 | -0.38 | -0.38 |
| 39.00  | -0.23       | -0.35 | -0.35 | -0.35 |
| 40.00  | -0.20       | -0.32 | -0.32 | -0.32 |
| 41.00  | -0.17       | -0.29 | -0.29 | -0.29 |
| 42.00  | -0.14       | -0.26 | -0.26 | -0.26 |
| 43.00  | -0.11       | -0.23 | -0.23 | -0.23 |
| 44.00  | -0.08       | -0.20 | -0.20 | -0.20 |
| 45.00  | -0.05       | -0.17 | -0.17 | -0.17 |
| 46.00  | -0.02       | -0.14 | -0.14 | -0.14 |
| 47.00  | 0.01        | -0.11 | -0.11 | -0.11 |
| 48.00  | 0.04        | -0.08 | -0.08 | -0.08 |
| 49.00  | 0.07        | -0.05 | -0.05 | -0.05 |
| 50.00  | 0.10        | -0.02 | -0.02 | -0.02 |
| 51.00  | 0.13        | 0.01  | 0.01  | 0.01  |
| 52.00  | 0.16        | 0.04  | 0.04  | 0.04  |
| 53.00  | 0.19        | 0.07  | 0.07  | 0.07  |
| 54.00  | 0.22        | 0.10  | 0.10  | 0.10  |
| 55.00  | 0.25        | 0.13  | 0.13  | 0.13  |
| 56.00  | 0.28        | 0.16  | 0.16  | 0.16  |
| 57.00  | 0.31        | 0.19  | 0.19  | 0.19  |
| 58.00  | 0.34        | 0.22  | 0.22  | 0.22  |
| 59.00  | 0.37        | 0.25  | 0.25  | 0.25  |
| 60.00  | 0.40        | 0.28  | 0.28  | 0.28  |
| 61.00  | 0.43        | 0.31  | 0.31  | 0.31  |
| 62.00  | 0.46        | 0.34  | 0.34  | 0.34  |
| 63.00  | 0.49        | 0.37  | 0.37  | 0.37  |
| 64.00  | 0.52        | 0.40  | 0.40  | 0.40  |
| 65.00  | 0.55        | 0.43  | 0.43  | 0.43  |
| 66.00  | 0.58        | 0.46  | 0.46  | 0.46  |
| 67.00  | 0.61        | 0.49  | 0.49  | 0.49  |
| 68.00  | 0.64        | 0.52  | 0.52  | 0.52  |
| 69.00  | 0.67        | 0.55  | 0.55  | 0.55  |
| 70.00  | 0.70        | 0.58  | 0.58  | 0.58  |
| 71.00  | 0.73        | 0.61  | 0.61  | 0.61  |
| 72.00  | 0.76        | 0.64  | 0.64  | 0.64  |
| 73.00  | 0.79        | 0.67  | 0.67  | 0.67  |
| 74.00  | 0.82        | 0.70  | 0.70  | 0.70  |
| 75.00  | 0.85        | 0.73  | 0.73  | 0.73  |
| 76.00  | 0.88        | 0.76  | 0.76  | 0.76  |
| 77.00  | 0.91        | 0.79  | 0.79  | 0.79  |
| 78.00  | 0.94        | 0.82  | 0.82  | 0.82  |
| 79.00  | 0.97        | 0.85  | 0.85  | 0.85  |
| 80.00  | 1.00        | 0.88  | 0.88  | 0.88  |
| 81.00  | 1.03        | 0.91  | 0.91  | 0.91  |
| 82.00  | 1.06        | 0.94  | 0.94  | 0.94  |
| 83.00  | 1.09        | 0.97  | 0.97  | 0.97  |
| 84.00  | 1.12        | 1.00  | 1.00  | 1.00  |
| 85.00  | 1.15        | 1.03  | 1.03  | 1.03  |
| 86.00  | 1.18        | 1.06  | 1.06  | 1.06  |
| 87.00  | 1.21        | 1.09  | 1.09  | 1.09  |
| 88.00  | 1.24        | 1.12  | 1.12  | 1.12  |
| 89.00  | 1.27        | 1.15  | 1.15  | 1.15  |
| 90.00  | 1.30        | 1.18  | 1.18  | 1.18  |
| 91.00  | 1.33        | 1.21  | 1.21  | 1.21  |
| 92.00  | 1.36        | 1.24  | 1.24  | 1.24  |
| 93.00  | 1.39        | 1.27  | 1.27  | 1.27  |
| 94.00  | 1.42        | 1.30  | 1.30  | 1.30  |
| 95.00  | 1.45        | 1.33  | 1.33  | 1.33  |
| 96.00  | 1.48        | 1.36  | 1.36  | 1.36  |
| 97.00  | 1.51        | 1.39  | 1.39  | 1.39  |
| 98.00  | 1.54        | 1.42  | 1.42  | 1.42  |
| 99.00  | 1.57        | 1.45  | 1.45  | 1.45  |
| 100.00 | 1.60        | 1.48  | 1.48  | 1.48  |

| Day    | 15minコンクリート | 1日    | 1週間   | 1ヶ月   |
|--------|-------------|-------|-------|-------|
| 10.00  | -0.68       | -0.81 | -0.86 | -0.86 |
| 11.00  | -0.65       | -0.78 | -0.83 | -0.83 |
| 12.00  | -0.62       | -0.75 | -0.80 | -0.80 |
| 13.00  | -0.59       | -0.72 | -0.77 | -0.77 |
| 14.00  | -0.56       | -0.69 | -0.74 | -0.74 |
| 15.00  | -0.53       | -0.66 | -0.71 | -0.71 |
| 16.00  | -0.50       | -0.63 | -0.68 | -0.68 |
| 17.00  | -0.47       | -0.60 | -0.65 | -0.65 |
| 18.00  | -0.44       | -0.57 | -0.62 | -0.62 |
| 19.00  | -0.41       | -0.54 | -0.59 | -0.59 |
| 20.00  | -0.38       | -0.51 | -0.56 | -0.56 |
| 21.00  | -0.35       | -0.48 | -0.53 | -0.53 |
| 22.00  | -0.32       | -0.45 | -0.50 | -0.50 |
| 23.00  | -0.29       | -0.42 | -0.47 | -0.47 |
| 24.00  | -0.26       | -0.39 | -0.44 | -0.44 |
| 25.00  | -0.23       | -0.36 | -0.41 | -0.41 |
| 26.00  | -0.20       | -0.33 | -0.38 | -0.38 |
| 27.00  | -0.17       | -0.30 | -0.35 | -0.35 |
| 28.00  | -0.14       | -0.27 | -0.32 | -0.32 |
| 29.00  | -0.11       | -0.24 | -0.29 | -0.29 |
| 30.00  | -0.08       | -0.21 | -0.26 | -0.26 |
| 31.00  | -0.05       | -0.18 | -0.23 | -0.23 |
| 32.00  | -0.02       | -0.15 | -0.20 | -0.20 |
| 33.00  | 0.01        | -0.12 | -0.17 | -0.17 |
| 34.00  | 0.04        | -0.09 | -0.14 | -0.14 |
| 35.00  | 0.07        | -0.06 | -0.11 | -0.11 |
| 36.00  | 0.10        | -0.03 | -0.08 | -0.08 |
| 37.00  | 0.13        | 0.00  | -0.05 | -0.05 |
| 38.00  | 0.16        | 0.03  | -0.02 | -0.02 |
| 39.00  | 0.19        | 0.06  | 0.01  | 0.01  |
| 40.00  | 0.22        | 0.09  | 0.04  | 0.04  |
| 41.00  | 0.25        | 0.12  | 0.07  | 0.07  |
| 42.00  | 0.28        | 0.15  | 0.10  | 0.10  |
| 43.00  | 0.31        | 0.18  | 0.13  | 0.13  |
| 44.00  | 0.34        | 0.21  | 0.16  | 0.16  |
| 45.00  | 0.37        | 0.24  | 0.19  | 0.19  |
| 46.00  | 0.40        | 0.27  | 0.22  | 0.22  |
| 47.00  | 0.43        | 0.30  | 0.25  | 0.25  |
| 48.00  | 0.46        | 0.33  | 0.28  | 0.28  |
| 49.00  | 0.49        | 0.36  | 0.31  | 0.31  |
| 50.00  | 0.52        | 0.39  | 0.34  | 0.34  |
| 51.00  | 0.55        | 0.42  | 0.37  | 0.37  |
| 52.00  | 0.58        | 0.45  | 0.40  | 0.40  |
| 53.00  | 0.61        | 0.48  | 0.43  | 0.43  |
| 54.00  | 0.64        | 0.51  | 0.46  | 0.46  |
| 55.00  | 0.67        | 0.54  | 0.49  | 0.49  |
| 56.00  | 0.70        | 0.57  | 0.52  | 0.52  |
| 57.00  | 0.73        | 0.60  | 0.55  | 0.55  |
| 58.00  | 0.76        | 0.63  | 0.58  | 0.58  |
| 59.00  | 0.79        | 0.66  | 0.61  | 0.61  |
| 60.00  | 0.82        | 0.69  | 0.64  | 0.64  |
| 61.00  | 0.85        | 0.72  | 0.67  | 0.67  |
| 62.00  | 0.88        | 0.75  | 0.70  | 0.70  |
| 63.00  | 0.91        | 0.78  | 0.73  | 0.73  |
| 64.00  | 0.94        | 0.81  | 0.76  | 0.76  |
| 65.00  | 0.97        | 0.84  | 0.79  | 0.79  |
| 66.00  | 1.00        | 0.87  | 0.82  | 0.82  |
| 67.00  | 1.03        | 0.90  | 0.85  | 0.85  |
| 68.00  | 1.06        | 0.93  | 0.88  | 0.88  |
| 69.00  | 1.09        | 0.96  | 0.91  | 0.91  |
| 70.00  | 1.12        | 0.99  | 0.94  | 0.94  |
| 71.00  | 1.15        | 1.02  | 0.97  | 0.97  |
| 72.00  | 1.18        | 1.05  | 1.00  | 1.00  |
| 73.00  | 1.21        | 1.08  | 1.03  | 1.03  |
| 74.00  | 1.24        | 1.11  | 1.06  | 1.06  |
| 75.00  | 1.27        | 1.14  | 1.09  | 1.09  |
| 76.00  | 1.30        | 1.17  | 1.12  | 1.12  |
| 77.00  | 1.33        | 1.20  | 1.15  | 1.15  |
| 78.00  | 1.36        | 1.23  | 1.18  | 1.18  |
| 79.00  | 1.39        | 1.26  | 1.21  | 1.21  |
| 80.00  | 1.42        | 1.29  | 1.24  | 1.24  |
| 81.00  | 1.45        | 1.32  | 1.27  | 1.27  |
| 82.00  | 1.48        | 1.35  | 1.30  | 1.30  |
| 83.00  | 1.51        | 1.38  | 1.33  | 1.33  |
| 84.00  | 1.54        | 1.41  | 1.36  | 1.36  |
| 85.00  | 1.57        | 1.44  | 1.39  | 1.39  |
| 86.00  | 1.60        | 1.47  | 1.42  | 1.42  |
| 87.00  | 1.63        | 1.50  | 1.45  | 1.45  |
| 88.00  | 1.66        | 1.53  | 1.48  | 1.48  |
| 89.00  | 1.69        | 1.56  | 1.51  | 1.51  |
| 90.00  | 1.72        | 1.59  | 1.54  | 1.54  |
| 91.00  | 1.75        | 1.62  | 1.57  | 1.57  |
| 92.00  | 1.78        | 1.65  | 1.60  | 1.60  |
| 93.00  | 1.81        | 1.68  | 1.63  | 1.63  |
| 94.00  | 1.84        | 1.71  | 1.66  | 1.66  |
| 95.00  | 1.87        | 1.74  | 1.69  | 1.69  |
| 96.00  | 1.90        | 1.77  | 1.72  | 1.72  |
| 97.00  | 1.93        | 1.80  | 1.75  | 1.75  |
| 98.00  | 1.96        | 1.83  | 1.78  | 1.78  |
| 99.00  | 1.99        | 1.86  | 1.81  | 1.81  |
| 100.00 | 2.02        | 1.89  | 1.84  | 1.84  |

| Day   | 15minコンクリート | 1日    | 1週間   | 1ヶ月   |
|-------|-------------|-------|-------|-------|
| 10.00 | -0.68       | -0.81 | -0.86 | -0.86 |
| 11.00 | -0.65       | -0.78 | -0.83 | -0.83 |
| 12.00 | -0.62       | -0.75 | -0.80 | -0.80 |
| 13.00 | -0.59       | -0.72 | -0.77 | -0.77 |
| 14.00 | -0.56       | -0.69 | -0.74 | -0.74 |
| 15.00 | -0.53       | -0.66 | -0.71 | -0.71 |
| 16.00 | -0.50       | -0.63 | -0.68 | -0.68 |
| 17.00 | -0.47       | -0.60 | -0.65 | -0.65 |
| 18.00 | -0.44       | -0.57 | -0.62 | -0.62 |
| 19.00 | -0.41       | -0.54 | -0.59 | -0.59 |
| 20.00 | -0.38       | -0.51 | -0.56 | -0.56 |
| 21.00 | -0.35       | -0.48 | -0.53 | -0.53 |
| 22.00 | -0.32       | -0.45 | -0.50 | -0.50 |
| 23.00 | -0.29       | -0.42 | -0.47 | -     |

Data of Fig. 2

| 測定結果   | 測定結果        | 測定結果       | 測定結果       |
|--------|-------------|------------|------------|
| コンクリート | 1,000mg/kg  | 1,500mg/kg | 2,000mg/kg |
| 3.950  | 4.420       | 4.210      | 3.760      |
| 4.110  | 4.890       | 4.880      | 4.280      |
| 3.530  | 3.410       | 4.070      | 4.070      |
| 3.310  | 4.860       | 4.260      | 4.710      |
| 3.690  | 6.110       | 2.610      | 3.780      |
| 3.140  | 3.660       | 4.910      | 3.260      |
| 4.100  | 4.100       | 4.910      | 4.910      |
| 平均値    |             |            |            |
| 3.830  | 4.100       | 4.210      | 4.290      |
| SD     | 0.550       | 1.300      | 0.794      |
| CV     | 0.124       | 0.483      | 0.200      |
| t-test | 11.70801813 | 0.00000000 | 1.29216136 |
| F検定    |             |            |            |
| 測定結果   | 測定結果        | 測定結果       | 測定結果       |
| コンクリート | 1,000mg/kg  | 1,500mg/kg | 2,000mg/kg |
| 3.950  | 4.420       | 4.210      | 3.760      |
| 4.110  | 4.890       | 4.880      | 4.280      |
| 3.530  | 3.410       | 4.070      | 4.070      |
| 3.310  | 4.860       | 4.260      | 4.710      |
| 3.690  | 6.110       | 2.610      | 3.780      |
| 3.140  | 3.660       | 4.910      | 3.260      |
| 4.100  | 4.100       | 4.910      | 4.910      |
| 平均値    |             |            |            |
| 3.810  | 4.110       | 4.260      | 4.170      |
| SD     | 1.13004894  | 1.60020551 | 0.91001161 |
| CV     | 0.29294134  | 0.38504452 | 0.21603016 |
| t-test | 0.84121217  | 0.0044488  | 0.01010202 |
| F検定    |             |            |            |
| 測定結果   | 測定結果        | 測定結果       | 測定結果       |
| コンクリート | 1,000mg/kg  | 1,500mg/kg | 2,000mg/kg |
| 3.96   | 4.466       | 4.166      | 3.766      |
| 4.170  | 4.477       | 4.114      | 3.196      |
| 3.790  | 4.050       | 4.010      | 3.176      |
| 3.950  | 4.176       | 3.914      | 3.810      |
| 4.194  | 4.317       | 4.842      | 4.492      |
| 3.292  | 4.170       | 4.216      | 3.566      |
| 3.170  | 4.170       | 4.216      | 3.566      |
| 平均値    |             |            |            |
| 3.960  | 4.170       | 4.166      | 3.892      |
| SD     | 0.30441189  | 0.40202022 | 0.26026009 |
| CV     | 0.07688487  | 0.13248544 | 0.06673792 |
| t-test | 13.71814821 | 0.00000000 | 0.00000000 |
| F検定    |             |            |            |
| 測定結果   | 測定結果        | 測定結果       | 測定結果       |
| コンクリート | 1,000mg/kg  | 1,500mg/kg | 2,000mg/kg |
| 4.024  | 4.392       | 4.414      | 4.242      |
| 4.032  | 4.134       | 4.170      | 4.112      |
| 3.274  | 4.242       | 4.414      | 4.260      |
| 4.114  | 4.372       | 4.032      | 4.134      |
| 3.462  | 4.262       | 4.214      | 4.242      |
| 4.154  | 4.372       | 4.262      | 4.032      |
| 4.032  | 4.372       | 4.262      | 4.032      |
| 平均値    |             |            |            |
| 4.014  | 4.310       | 4.246      | 4.210      |
| SD     | 0.21044406  | 0.33888838 | 0.20377263 |
| CV     | 0.05212586  | 0.11962162 | 0.04807464 |
| t-test | 10.8884114  | 0.00000000 | 0.00000000 |
| F検定    |             |            |            |
| 測定結果   | 測定結果        | 測定結果       | 測定結果       |
| コンクリート | 1,000mg/kg  | 1,500mg/kg | 2,000mg/kg |
| 4.032  | 4.372       | 4.262      | 4.032      |
| 4.032  | 4.372       | 4.262      | 4.032      |
| 3.462  | 4.372       | 4.262      | 4.032      |
| 4.032  | 4.372       | 4.262      | 4.032      |
| 3.462  | 4.372       | 4.262      | 4.032      |
| 4.032  | 4.372       | 4.262      | 4.032      |
| 平均値    |             |            |            |
| 4.032  | 4.372       | 4.262      | 4.032      |
| SD     | 0.15007036  | 0.44824097 | 0.17609026 |
| CV     | 0.04667076  | 0.10266864 | 0.04369154 |
| t-test | 0.15413449  | 0.0447110  | 0.00000000 |
| F検定    |             |            |            |

● 検体No.1-1の検体結果

| 測定結果   | 測定結果        | 測定結果       | 測定結果       |
|--------|-------------|------------|------------|
| コンクリート | 1,000mg/kg  | 1,500mg/kg | 2,000mg/kg |
| 3.950  | 4.420       | 4.210      | 3.760      |
| 4.110  | 4.890       | 4.880      | 4.280      |
| 3.530  | 3.410       | 4.070      | 4.070      |
| 3.310  | 4.860       | 4.260      | 4.710      |
| 3.690  | 6.110       | 2.610      | 3.780      |
| 3.140  | 3.660       | 4.910      | 3.260      |
| 4.100  | 4.100       | 4.910      | 4.910      |
| 平均値    |             |            |            |
| 3.830  | 4.100       | 4.210      | 4.290      |
| SD     | 0.550       | 1.300      | 0.794      |
| CV     | 0.124       | 0.483      | 0.200      |
| t-test | 11.70801813 | 0.00000000 | 1.29216136 |
| F検定    |             |            |            |
| 測定結果   | 測定結果        | 測定結果       | 測定結果       |
| コンクリート | 1,000mg/kg  | 1,500mg/kg | 2,000mg/kg |
| 3.950  | 4.420       | 4.210      | 3.760      |
| 4.110  | 4.890       | 4.880      | 4.280      |
| 3.530  | 3.410       | 4.070      | 4.070      |
| 3.310  | 4.860       | 4.260      | 4.710      |
| 3.690  | 6.110       | 2.610      | 3.780      |
| 3.140  | 3.660       | 4.910      | 3.260      |
| 4.100  | 4.100       | 4.910      | 4.910      |
| 平均値    |             |            |            |
| 3.810  | 4.110       | 4.260      | 4.170      |
| SD     | 1.13004894  | 1.60020551 | 0.91001161 |
| CV     | 0.29294134  | 0.38504452 | 0.21603016 |
| t-test | 0.84121217  | 0.0044488  | 0.01010202 |
| F検定    |             |            |            |

● 検体No.1-2の検体結果

| 測定結果   | 測定結果        | 測定結果       | 測定結果       |
|--------|-------------|------------|------------|
| コンクリート | 1,000mg/kg  | 1,500mg/kg | 2,000mg/kg |
| 3.96   | 4.466       | 4.166      | 3.766      |
| 4.170  | 4.477       | 4.114      | 3.196      |
| 3.790  | 4.050       | 4.010      | 3.176      |
| 3.950  | 4.176       | 3.914      | 3.810      |
| 4.194  | 4.317       | 4.842      | 4.492      |
| 3.292  | 4.170       | 4.216      | 3.566      |
| 3.170  | 4.170       | 4.216      | 3.566      |
| 平均値    |             |            |            |
| 3.960  | 4.170       | 4.166      | 3.892      |
| SD     | 0.30441189  | 0.40202022 | 0.26026009 |
| CV     | 0.07688487  | 0.13248544 | 0.06673792 |
| t-test | 13.71814821 | 0.00000000 | 0.00000000 |
| F検定    |             |            |            |

● 検体No.1-3の検体結果

| 測定結果   | 測定結果       | 測定結果       | 測定結果       |
|--------|------------|------------|------------|
| コンクリート | 1,000mg/kg | 1,500mg/kg | 2,000mg/kg |
| 4.024  | 4.392      | 4.414      | 4.242      |
| 4.032  | 4.134      | 4.170      | 4.112      |
| 3.274  | 4.242      | 4.414      | 4.260      |
| 4.114  | 4.372      | 4.032      | 4.134      |
| 3.462  | 4.262      | 4.214      | 4.242      |
| 4.154  | 4.372      | 4.262      | 4.032      |
| 4.032  | 4.372      | 4.262      | 4.032      |
| 平均値    |            |            |            |
| 4.014  | 4.310      | 4.246      | 4.210      |
| SD     | 0.21044406 | 0.33888838 | 0.20377263 |
| CV     | 0.05212586 | 0.11962162 | 0.04807464 |
| t-test | 10.8884114 | 0.00000000 | 0.00000000 |
| F検定    |            |            |            |

● 検体No.1-4の検体結果

| 測定結果   | 測定結果       | 測定結果       | 測定結果       |
|--------|------------|------------|------------|
| コンクリート | 1,000mg/kg | 1,500mg/kg | 2,000mg/kg |
| 4.032  | 4.372      | 4.262      | 4.032      |
| 4.032  | 4.372      | 4.262      | 4.032      |
| 3.462  | 4.372      | 4.262      | 4.032      |
| 4.032  | 4.372      | 4.262      | 4.032      |
| 3.462  | 4.372      | 4.262      | 4.032      |
| 4.032  | 4.372      | 4.262      | 4.032      |
| 平均値    |            |            |            |
| 4.032  | 4.372      | 4.262      | 4.032      |
| SD     | 0.15007036 | 0.44824097 | 0.17609026 |
| CV     | 0.04667076 | 0.10266864 | 0.04369154 |
| t-test | 0.15413449 | 0.0447110  | 0.00000000 |
| F検定    |            |            |            |

● 検体No.1-5の検体結果

| 測定結果   | 測定結果       | 測定結果       | 測定結果       |
|--------|------------|------------|------------|
| コンクリート | 1,000mg/kg | 1,500mg/kg | 2,000mg/kg |
| 4.032  | 4.372      | 4.262      | 4.032      |
| 4.032  | 4.372      | 4.262      | 4.032      |
| 3.462  | 4.372      | 4.262      | 4.032      |
| 4.032  | 4.372      | 4.262      | 4.032      |
| 3.462  | 4.372      | 4.262      | 4.032      |
| 4.032  | 4.372      | 4.262      | 4.032      |
| 平均値    |            |            |            |
| 4.032  | 4.372      | 4.262      | 4.032      |
| SD     | 0.15007036 | 0.44824097 | 0.17609026 |
| CV     | 0.04667076 | 0.10266864 | 0.04369154 |
| t-test | 0.15413449 | 0.0447110  | 0.00000000 |
| F検定    |            |            |            |

● 検体No.1-6の検体結果

| 測定結果   | 測定結果       | 測定結果       | 測定結果       |
|--------|------------|------------|------------|
| コンクリート | 1,000mg/kg | 1,500mg/kg | 2,000mg/kg |
| 4.032  | 4.372      | 4.262      | 4.032      |
| 4.032  | 4.372      | 4.262      | 4.032      |
| 3.462  | 4.372      | 4.262      | 4.032      |
| 4.032  | 4.372      | 4.262      | 4.032      |
| 3.462  | 4.372      | 4.262      | 4.032      |
| 4.032  | 4.372      | 4.262      | 4.032      |
| 平均値    |            |            |            |
| 4.032  | 4.372      | 4.262      | 4.032      |
| SD     | 0.15007036 | 0.44824097 | 0.17609026 |
| CV     | 0.04667076 | 0.10266864 | 0.04369154 |
| t-test | 0.15413449 | 0.0447110  | 0.00000000 |
| F検定    |            |            |            |

● 検体No.1-7の検体結果

| 測定結果   | 測定結果       | 測定結果       | 測定結果       |
|--------|------------|------------|------------|
| コンクリート | 1,000mg/kg | 1,500mg/kg | 2,000mg/kg |
| 4.032  | 4.372      | 4.262      | 4.032      |
| 4.032  | 4.372      | 4.262      | 4.032      |
| 3.462  | 4.372      | 4.262      | 4.032      |
| 4.032  | 4.372      | 4.262      | 4.032      |
| 3.462  | 4.372      | 4.262      | 4.032      |
| 4.032  | 4.372      | 4.262      | 4.032      |
| 平均値    |            |            |            |
| 4.032  | 4.372      | 4.262      | 4.032      |
| SD     | 0.15007036 | 0.44824097 | 0.17609026 |
| CV     | 0.04667076 | 0.10266864 | 0.04369154 |
| t-test | 0.15413449 | 0.0447110  | 0.00000000 |
| F検定    |            |            |            |

● 検体No.1-8の検体結果

| 測定結果   | 測定結果       | 測定結果       | 測定結果       |
|--------|------------|------------|------------|
| コンクリート | 1,000mg/kg | 1,500mg/kg | 2,000mg/kg |
| 4.032  | 4.372      | 4.262      | 4.032      |
| 4.032  | 4.372      | 4.262      | 4.032      |
| 3.462  | 4.372      | 4.262      | 4.032      |
| 4.032  | 4.372      | 4.262      | 4.032      |
| 3.462  | 4.372      | 4.262      | 4.032      |
| 4.032  | 4.372      | 4.262      | 4.032      |
| 平均値    |            |            |            |
| 4.032  | 4.372      | 4.262      | 4.032      |
| SD     | 0.15007036 | 0.44824097 | 0.17609026 |
| CV     | 0.04667076 | 0.10266864 | 0.04369154 |
| t-test | 0.15413449 | 0.0447110  | 0.00000000 |
| F検定    |            |            |            |

● 検体No.2-1の検体結果

| 測定結果   | 測定結果       | 測定結果       | 測定結果       |
|--------|------------|------------|------------|
| コンクリート | 1,000mg/kg | 1,500mg/kg | 2,000mg/kg |
| 4.032  | 4.372      | 4.262      | 4.032      |
| 4.032  | 4.372      | 4.262      | 4.032      |
| 3.462  | 4.372      | 4.262      | 4.032      |
| 4.032  | 4.372      | 4.262      | 4.032      |
| 3.462  | 4.372      | 4.262      | 4.032      |
| 4.032  | 4.372      | 4.262      | 4.032      |
| 平均値    |            |            |            |
| 4.032  | 4.372      | 4.262      | 4.032      |
| SD     | 0.15007036 | 0.44824097 | 0.17609026 |
| CV     | 0.04667076 | 0.10266864 | 0.04369154 |
| t-test | 0.15413449 | 0.0447110  | 0.00000000 |
| F検定    |            |            |            |

● 検体No.2-2の検体結果

| 測定結果   | 測定結果       | 測定結果       | 測定結果       |
|--------|------------|------------|------------|
| コンクリート | 1,000mg/kg | 1,500mg/kg | 2,000mg/kg |
| 4.032  | 4.372      | 4.262      | 4.032      |
| 4.032  | 4.372      | 4.262      | 4.032      |
| 3.462  | 4.372      | 4.262      | 4.032      |
| 4.032  | 4.372      | 4.262      | 4.032      |
| 3.462  | 4.372      | 4.262      | 4.032      |
| 4.032  | 4.372      | 4.262      | 4.032      |
| 平均値    |            |            |            |
| 4.032  | 4.372      | 4.262      | 4.032      |
| SD     | 0.15007036 | 0.44824097 | 0.17609026 |
| CV     | 0.04667076 | 0.10266864 | 0.04369154 |
| t-test | 0.15413449 | 0.0447110  | 0.00000000 |
| F検定    |            |            |            |

● 検体No.2-3の検体結果

||
||
||

Data of Fig. 3

| Total Fat Mass (cm2)    |         | Control | With BTS |
|-------------------------|---------|---------|----------|
|                         |         | 14.49   | 2.05     |
|                         |         | 9.87    | 0.90     |
|                         |         | 6.37    | 3.32     |
|                         |         |         |          |
|                         | Average | 10.24   | 2.09     |
|                         | SD      | 4.07    | 1.21     |
|                         | t-test  |         | #NAME?   |
|                         |         |         |          |
| Visceral Fat Mass (cm2) |         | Control | With BTS |
|                         |         | 9.89    | 1.22     |
|                         |         | 5.66    | 0.46     |
|                         |         | 4.90    | 2.48     |
|                         |         |         |          |
|                         | Average | 6.82    | 1.38     |
|                         | SD      | 2.69    | 1.02     |
|                         | t-test  |         | #NAME?   |
|                         |         |         |          |
| Body Fat %              |         | Control | With BTS |
|                         |         | 47.15   | 11.863   |
|                         |         | 34.289  | 7.325    |
|                         |         | 27.822  | 16.473   |
|                         |         |         |          |
|                         | Average | 36.42   | 11.89    |
|                         | SD      | 9.84    | 4.57     |
|                         | t-test  |         | #NAME?   |

Data of Fig. 4

| Size of Adipocyte (micro m2) |         |         |            |
|------------------------------|---------|---------|------------|
|                              |         | Control | plus BTS   |
| 14 days                      |         | 6655    | 2468       |
|                              |         |         |            |
|                              |         |         |            |
| 25 days                      |         | 7104    | 1509       |
|                              |         | 13107   | 3928       |
|                              |         | 10555   | 2210       |
|                              |         |         |            |
|                              | Average | 10255   | 2549       |
|                              | SD      | 3013    | 1245       |
|                              | t-test  |         | 0.01491487 |

Data of Fig. 5

| Glucose |        |        |       |       |
|---------|--------|--------|-------|-------|
| コントロール  | 1      | 1.5    | 2     |       |
|         | 126    | 182    | 155   | 89    |
|         | 172    | 135    | 164   | 95    |
|         | 140    | 197    | 143   | 119   |
|         | 213    | 190    | 99    | 116   |
|         | 146    | 180    | 137   | 105   |
|         | 158    | 95     | 100   | 111   |
| Average | 159.2  | 159.5  | 133.0 | 105.2 |
| SD      | 30.7   | 39.0   | 37.6  | 11.9  |
|         |        |        |       |       |
|         |        |        |       |       |
| Insulin |        |        |       |       |
| コントロール  | 1      | 1.5    | 2     |       |
|         | 16.93  | 16.73  | 4.26  | 1.05  |
|         | 13.60  | 4.28   | 5.67  | 3.27  |
|         | 8.54   | 7.14   | 4.49  | 2.23  |
|         | 10.04  | 6.84   | 2.34  | 3.53  |
|         | 12.30  | 19.76  | 6.38  | 2.23  |
|         | 16.62  | 12.94  | 1.02  | 3.12  |
| Average | 13.04  | 11.18  | 4.03  | 2.97  |
| SD      | 3.43   | 6.14   | 2.02  | 0.92  |
|         |        |        |       |       |
|         |        |        |       |       |
| HOMA-IR |        |        |       |       |
| コントロール  | 1      | 1.5    | 2     |       |
|         | 136.9  | 195.4  | 42.4  | 6.0   |
|         | 150.2  | 37.1   | 59.7  | 19.9  |
|         | 76.8   | 80.2   | 41.3  | 17.0  |
|         | 137.3  | 82.5   | 14.9  | 26.3  |
|         | 115.3  | 203.0  | 56.1  | 15.0  |
|         | 170.6  | 75.2   | 6.6   | 22.3  |
| Average | 131.18 | 114.08 | 36.82 | 17.36 |
| SD      | 32.23  | 66.48  | 21.68 | 6.88  |

● 母平均:700(全標比較)

| ■ 基本統計量 |   |     |            |             |
|---------|---|-----|------------|-------------|
| カテゴリ名   | n | 合計  | 平均         | 分散(n-1)     |
| コントロール  | 6 | 955 | 159.166667 | 940.966667  |
| 1       | 6 | 950 | 158.333333 | 1520.566667 |
| 1.5     | 6 | 798 | 133        | 761.2       |
| 2       | 6 | 635 | 105.833333 | 140.966667  |

■ 等分散性の検定 (F-Test)

| 分布  |             | カイニ乗分布      |
|-----|-------------|-------------|
| 自由度 | 3           | 5.450050373 |
| 統計量 | 11.34486673 | 7.814727903 |
| 5%点 | 0.14165687  | [ ]         |
| 判定  |             |             |

■ 分散分析表

| 要因 | 自由度 | 偏差平方和       | 不偏分散        | 分散比         | p値          | 判定  |
|----|-----|-------------|-------------|-------------|-------------|-----|
| 全体 | 23  | 28673.95933 | 395.819444  | 4.699372054 | 0.012167924 | [*] |
| A  | 3   | 11855.45833 | 3951.819444 | 4.699372054 | 0.012167924 | [*] |
| 誤差 | 20  | 16818.5     | 840.925     |             |             |     |

■ 母平均の差の検定と推定

| カテゴリ名1 | カテゴリ名2 | 平均1        | 平均2        | 差           | 統計量         | 5%点    | 1%点    | 判定  | 信頼水準95%      |              | 信頼水準99%      |              |
|--------|--------|------------|------------|-------------|-------------|--------|--------|-----|--------------|--------------|--------------|--------------|
|        |        |            |            |             |             |        |        |     | 下限値          | 上限値          | 下限値          | 上限値          |
| コントロール | 1      | 159.166667 | 158.333333 | -0.66666667 | 0.05631262  | 3.9583 | 5.0178 | [ ] | -47.52768404 | 46.19435071  | -60.07075756 | 58.73742423  |
| コントロール | 1.5    | 159.166667 | 133        | 26.16666667 | 2.210270337 | 3.9583 | 5.0178 | [ ] | -20.69435071 | 73.02768404  | -33.23742423 | 85.57075756  |
| コントロール | 2      | 159.166667 | 105.833333 | 53.33333333 | 4.50509604  | 3.9583 | 5.0178 | [*] | 6.472315959  | 100.19435071 | -6.07075756  | 112.73742423 |
| 1      | 1.5    | 159.833333 | 133        | 26.83333333 | 2.266582957 | 3.9583 | 5.0178 | [ ] | -20.02768404 | 73.69435071  | -32.57075756 | 86.23742423  |
| 1      | 2      | 159.833333 | 105.833333 | 54          | 4.561322224 | 3.9583 | 5.0178 | [*] | 7.138952626  | 100.8610174  | -5.404306892 | 115.40430689 |
| 1.5    | 2      | 133        | 105.833333 | 27.16666667 | 2.294738267 | 3.9583 | 5.0178 | [ ] | -19.69435071 | 74.02768404  | -32.23742423 | 86.57075756  |

● 母平均:1000(全標比較)

◎ パートレットの検定

| 項目     |    |             | 分布          |      | x2分布        |             |
|--------|----|-------------|-------------|------|-------------|-------------|
| コントロール | 件数 | 分散(n-1)     | 統計量         | 自由度  | 5%点         | 1%点         |
| 1      | 6  | 11.89946789 | 14.30235378 | 3    | 7.814727903 | 11.34486673 |
| 1.5    | 6  | 37.69618021 | 0.002521193 |      |             |             |
| 2      | 6  | 4.082746769 | 検定マーク       | [**] |             |             |
| 2      | 6  | 0.850606803 |             |      |             |             |

◎ 平均値表

| 項目名  | コントロール      | 1           | 1.5         | 2           | 全体          |
|------|-------------|-------------|-------------|-------------|-------------|
| 件数   | 6           | 6           | 6           | 6           | 24          |
| データ計 | 78.23643076 | 67.08667223 | 24.16785903 | 15.43257753 | 184.9235395 |
| 平均値  | 13.03940513 | 11.18111204 | 4.027978505 | 2.572096235 | 7.706147461 |

◎ 分散分析表

| 変数因子  | 自由度 | 偏差平方和       | 不偏分散        | 分散比         | p値          | 判定   |
|-------|-----|-------------|-------------|-------------|-------------|------|
| 全体(T) | 23  | 755.039214  |             |             |             |      |
| 因子(A) | 3   | 482.4386131 | 160.81271   | 11.79866587 | 0.000114089 | [**] |
| 誤差(E) | 20  | 272.5950084 | 13.62975042 |             |             |      |

◎ 同時信頼域表

| 項目名    | 項目名 | 平均値差        | 0.05        |              | 0.01        |             | 判定           |             |      |
|--------|-----|-------------|-------------|--------------|-------------|-------------|--------------|-------------|------|
|        |     |             | 精度          | 下限値          | 精度          | 下限値         |              |             |      |
| コントロール | 1   | 1.89828089  | 6.498484355 | -4.640191286 | 8.396777448 | 8.204044327 | -6.345751237 | 10.06233742 | [ ]  |
| コントロール | 1.5 | 9.011438622 | 6.498484355 | 2.512944267  | 15.50991298 | 8.204044327 | 0.807384293  | 17.21647206 | [**] |
| コントロール | 2   | 10.46730887 | 6.498484355 | 3.968824517  | 16.96576323 | 8.204044327 | 2.26264546   | 18.6713532  | [**] |
| 1      | 1.5 | 7.153135332 | 6.498484355 | 0.654651177  | 13.65161989 | 8.204044327 | -1.050908794 | 15.35717986 | [*]  |
| 1      | 2   | 6.609015783 | 6.498484355 | 2.110531427  | 15.10750014 | 8.204044327 | 0.404971456  | 16.81306011 | [**] |
| 1.5    | 2   | 1.45588025  | 6.498484355 | -5.042604105 | 7.954364606 | 8.204044327 | -6.748164076 | 9.659924577 | [ ]  |

● 母平均:1000(全標比較)

◎ パートレットの検定

| 項目     |    |             | 分布          |      | x2分布        |             |
|--------|----|-------------|-------------|------|-------------|-------------|
| コントロール | 件数 | 分散(n-1)     | 統計量         | 自由度  | 5%点         | 1%点         |
| 1      | 6  | 1038.86443  | 18.38227882 | 3    | 7.814727903 | 11.34486673 |
| 1.5    | 6  | 4691.46544  | 0.000370299 |      |             |             |
| 2      | 6  | 468.9536567 | 検定マーク       | [**] |             |             |
| 2      | 6  | 48.74117217 |             |      |             |             |

◎ 平均値表

| 項目名  | コントロール      | 1           | 1.5         | 2           | 全体          |
|------|-------------|-------------|-------------|-------------|-------------|
| 件数   | 6           | 6           | 6           | 6           | 24          |
| データ計 | 787.0885037 | 654.493     | 220.91      | 106.543     | 1799.034504 |
| 平均値  | 131.1814173 | 114.0821667 | 36.81833333 | 17.75716667 | 74.95977099 |

◎ 分散分析表

| 変数因子  | 自由度 | 偏差平方和       | 不偏分散        | 分散比        | p値          | 判定   |
|-------|-----|-------------|-------------|------------|-------------|------|
| 全体(T) | 23  | 87750.17888 |             |            |             |      |
| 因子(A) | 3   | 56510.05538 | 18836.68513 | 12.0592898 | 9.95065E-05 | [**] |
| 誤差(E) | 20  | 31240.1235  | 1562.006175 |            |             |      |

◎ 同時信頼域表

| 項目名    | 項目名 | 平均値差        | 0.05        |              | 0.01        |             | 判定           |             |      |
|--------|-----|-------------|-------------|--------------|-------------|-------------|--------------|-------------|------|
|        |     |             | 精度          | 下限値          | 精度          | 下限値         |              |             |      |
| コントロール | 1   | 17.08925062 | 69.56799699 | -52.46874637 | 86.66724761 | 87.82646842 | -70.72721781 | 104.925719  | [ ]  |
| コントロール | 1.5 | 94.36308395 | 69.56799699 | 24.79508696  | 163.9310809 | 87.82646842 | 6.536615527  | 182.1895524 | [**] |
| コントロール | 2   | 113.4242506 | 69.56799699 | 43.85625363  | 182.9922476 | 87.82646842 | 25.59778219  | 201.250719  | [**] |
| 1      | 1.5 | 77.26383333 | 69.56799699 | 7.695836341  | 146.818303  | 87.82646842 | -10.56263509 | 165.0903018 | [*]  |
| 1      | 2   | 96.325      | 69.56799699 | 26.75700301  | 165.892997  | 87.82646842 | 8.498531576  | 184.1514684 | [**] |
| 1.5    | 2   | 19.06116667 | 69.56799699 | -50.50683033 | 88.62916366 | 87.82646842 | -68.76530176 | 106.8876351 | [ ]  |

Data of Fig. 6

| Leptin  | コントロール | 1.0g/kg | 1.5g/kg | 2.0 g/kg |
|---------|--------|---------|---------|----------|
|         | 79.144 | 85.470  | 7.384   | 3.775    |
|         | 82.254 | 83.756  | 10.975  | 8.083    |
|         | 44.143 | 30.377  | 8.923   | 4.138    |
|         | 13.346 | 8.864   | 8.253   | 11.979   |
|         | 48.192 | 82.156  | 31.342  | 11.211   |
|         | 71.219 | 44.080  | 1.669   | 11.329   |
|         |        |         |         | 12.068   |
| Average | 56.383 | 52.450  | 11.091  | 8.652    |
| SD      | 26.369 | 30.191  | 10.374  | 3.815    |

| Adiponectin | コントロール | 1.0g/kg | 1.5g/kg | 2.0 g/kg |
|-------------|--------|---------|---------|----------|
|             | 12.107 | 10.477  | 9.480   | 10.379   |
|             | 13.503 | 10.100  | 11.998  | 10.477   |
|             | 11.925 | 12.049  | 10.964  | 10.100   |
|             | 11.651 | 7.105   | 8.436   | 12.049   |
|             | 9.018  | 10.470  | 7.322   | 10.843   |
|             | 6.609  | 12.114  | 7.322   | 9.699    |
|             |        |         |         | 9.761    |
| Average     | 10.802 | 10.386  | 9.254   | 10.473   |
| SD          | 2.520  | 1.823   | 1.931   | 0.804    |

● 毎平均:1.5g/kg(全群比較)

◎ パートレットの検定

| 項目       | 件数 | 分散(n-1)     | 分布   | χ <sup>2</sup> 分布 |
|----------|----|-------------|------|-------------------|
| コントロール   | 6  | 685.3258433 | 統計量  | 18.70840041       |
| 1.0g/kg  | 6  | 911.5263558 | 自由度  | 3                 |
| 1.5g/kg  | 6  | 107.6141208 | 5%点  | 7.814727903       |
| 2.0 g/kg | 7  | 14.55270015 | 1%点  | 11.34486673       |
|          |    |             | 確率   | 0.0003141         |
|          |    |             | 検定マウ | [**]              |

◎ 平均値表

| 項目名 | コントロール      | 1.0g/kg     | 1.5g/kg     | 2.0 g/kg    | 全体          |
|-----|-------------|-------------|-------------|-------------|-------------|
| 件数  | 6           | 6           | 6           | 7           | 25          |
| 総平均 | 339.2979782 | 314.7029697 | 86.54614957 | 60.56326485 | 780.1103613 |
| 平均値 | 56.38289636 | 52.45049478 | 11.09102493 | 8.651894978 | 31.20441445 |

◎ 分散分析表

| 変動因子  | 自由度 | 偏差平方和       | 不偏分散        | 分散比        | p値          | 判定   |
|-------|-----|-------------|-------------|------------|-------------|------|
| 全体(T) | 24  | 21159.36927 |             |            |             |      |
| 因子(A) | 3   | 12499.74507 | 4166.58189  | 10.1041585 | 0.000252526 | [**] |
| 誤差(E) | 21  | 8659.6242   | 412.3630572 |            |             |      |

◎ 同時信頼区間表

| 同時信頼区間表 | 項目名     | 平均値         | 0.05        |              | 0.01        |             | 判定           |             |      |
|---------|---------|-------------|-------------|--------------|-------------|-------------|--------------|-------------|------|
|         |         |             | 下側値         | 上側値          | 下側値         | 上側値         |              |             |      |
|         | コントロール  | 3.932501574 | 35.59454845 | -31.66204688 | 39.52705003 | 44.8316472  | -40.89914562 | 48.76414877 | [ ]  |
|         | コントロール  | 45.29197143 | 35.59454845 | 9.697422982  | 80.86851989 | 44.8316472  | 0.460324236  | 90.12361883 | [**] |
|         | コントロール  | 47.73110138 | 34.29976513 | 13.43133625  | 82.03086652 | 43.20085621 | 4.530245178  | 90.93195759 | [**] |
|         | 1.0g/kg | 41.35946886 | 35.59454845 | 5.764921408  | 76.95401831 | 44.8316472  | -3.472177338 | 86.19111706 | [*]  |
|         | 1.0g/kg | 43.79859981 | 34.29976513 | 9.488834678  | 78.08836494 | 43.20085621 | 0.597743605  | 86.99945602 | [**] |
|         | 1.5g/kg | 2.43912995  | 34.29976513 | -31.86063518 | 38.73889508 | 43.20085621 | -40.76172626 | 45.63988616 | [ ]  |

● 毎平均:1.5g/kg(全群比較)

■ 基本統計量

| カテゴリ名    | n | 合計          | 平均          | 分散(n-1)     |
|----------|---|-------------|-------------|-------------|
| コントロール   | 6 | 64.81294884 | 10.80215814 | 6.349190095 |
| 1.0g/kg  | 6 | 62.31588384 | 10.38598064 | 3.32227489  |
| 1.5g/kg  | 6 | 55.52170225 | 9.253617041 | 3.727717966 |
| 2.0 g/kg | 7 | 73.30881883 | 10.47268812 | 0.845655431 |

■ 等分散性の検定 (パートレット)

| 分布  | カイニ乗分布      |
|-----|-------------|
| 自由度 | 3           |
| 統計量 | 5.87450577  |
| 1%点 | 11.34486673 |
| 5%点 | 7.814727903 |
| p値  | 0.117878005 |
| 判定  | [ ]         |

■ 分散分析表

| 要因 | 自由度 | 偏差平方和       | 不偏分散        | 分散比         | p値          | 判定  |
|----|-----|-------------|-------------|-------------|-------------|-----|
| 全体 | 24  | 79.11048836 |             |             |             |     |
| A  | 3   | 8.240641018 | 2.746886339 | 0.813949646 | 0.500476627 | [ ] |
| 誤差 | 21  | 70.86984734 | 3.374756635 |             |             |     |

■ 毎平均の差の検定と推定

| カテゴリ名1  | カテゴリ名2   | 平均1         | 平均2         | 差            | 統計量         | 信頼水準95% |        | 信頼水準99%      |             |
|---------|----------|-------------|-------------|--------------|-------------|---------|--------|--------------|-------------|
|         |          |             |             |              |             | 下側値     | 上側値    | 下側値          | 上側値         |
| コントロール  | 1.0g/kg  | 10.80215814 | 10.38598064 | 0.4161775    | 0.554923506 | 3.9419  | 4.9856 | -3.322886576 | 4.155241577 |
| コントロール  | 1.5g/kg  | 10.80215814 | 9.253617041 | 1.5485411    | 2.064796523 | 3.9419  | 4.9856 | -2.190522977 | 5.287605176 |
| コントロール  | 2.0 g/kg | 10.80215814 | 10.47268812 | 0.329470022  | 0.455892839 | 3.9419  | 4.9856 | -3.273582277 | 3.932522321 |
| 1.0g/kg | 1.5g/kg  | 10.38598064 | 9.253617041 | 1.132363599  | 1.500873018 | 3.9419  | 4.9856 | -2.606700477 | 4.871427675 |
| 1.0g/kg | 2.0 g/kg | 10.38598064 | 10.47268812 | -0.086707479 | 0.119578499 | 3.9419  | 4.9856 | -3.689759778 | 3.51634482  |
| 1.5g/kg | 2.0 g/kg | 9.253617041 | 10.47268812 | -1.219071078 | 1.888847778 | 3.9419  | 4.9856 | -4.822123377 | 2.383681221 |

Data of Fig. 7

| Triglycerol | コントロール | 1g/kg  | 1.5g/kg | 2 g/kg |
|-------------|--------|--------|---------|--------|
|             | 3.8481 | 1.4859 | 1.6232  | 1.7176 |
|             | 2.0532 | 1.9494 | 0.6362  | 0.9709 |
|             | 3.6214 | 2.5416 | 1.7244  | 2.1038 |
|             | 2.1291 | 1.4714 | 0.6877  | 1.7691 |
|             | 2.6400 | 1.7691 | 1.4859  | 0.5589 |
|             | 1.5889 | 2.5674 | 0.9194  | 1.4859 |
| Average     | 2.6469 | 1.9641 | 1.1795  | 1.4344 |
| SD          | 0.9094 | 0.4913 | 0.4883  | 0.5700 |

| HDL     | コントロール | 1g/kg  | 1.5g/kg | 2 g/kg |
|---------|--------|--------|---------|--------|
|         | 1.912  | 2.088  | 2.388   | 1.695  |
|         | 2.124  | 2.073  | 1.868   | 1.783  |
|         | 1.956  | 1.849  | 2.011   | 2.267  |
|         | 1.541  | 2.267  | 1.952   | 2.429  |
|         | 1.703  | 2.022  | 2.355   | 1.805  |
|         | 1.967  | 1.633  | 1.541   | 1.809  |
| Average | 1.8672 | 1.9888 | 2.0194  | 1.9650 |
| SD      | 0.2092 | 0.2198 | 0.3178  | 0.3039 |

| LDL     | コントロール | 1g/kg  | 1.5g/kg | 2 g/kg |
|---------|--------|--------|---------|--------|
|         | 0.354  | 0.379  | 0.456   | 0.401  |
|         | 0.339  | 0.296  | 0.250   | 0.427  |
|         | 0.384  | 0.447  | 0.317   | 0.419  |
|         | 0.317  | 0.329  | 0.337   | 0.435  |
|         | 0.296  | 0.266  | 0.337   | 0.354  |
|         | 0.274  | 0.427  | 0.227   | 0.223  |
| Average | 0.3299 | 0.3673 | 0.3207  | 0.3767 |
| SD      | 0.0430 | 0.0726 | 0.0806  | 0.0806 |

● 検平均: F-値 (金網比較)

■ 基本統計量

| カテゴリ名   | n | 合計        | 平均          | 分散(n-1)     |
|---------|---|-----------|-------------|-------------|
| コントロール  | 6 | 15.881681 | 2.64696833  | 0.826996291 |
| 1g/kg   | 6 | 11.784793 | 1.964132167 | 0.241409096 |
| 1.5g/kg | 6 | 7.076742  | 1.179457    | 0.238476421 |
| 2 g/kg  | 6 | 8.606291  | 1.434381833 | 0.328542326 |

■ 等分散性の検定 (バートレット)

| 分布  | カイニ乗分布      |
|-----|-------------|
| 自由度 | 3           |
| 統計量 | 2.688376049 |
| 1%点 | 11.34466673 |
| 5%点 | 7.814727903 |
| p値  | 0.442206279 |
| 判定  | [ ]         |

■ 分散分析表

| 要因 | 自由度 | 偏差平方和       | 不偏分散        | 分散比         | p値          | 判定  |
|----|-----|-------------|-------------|-------------|-------------|-----|
| 全体 | 23  | 15.73980026 |             |             |             |     |
| A  | 3   | 7.577120044 | 2.525706681 | 6.191458946 | 0.003773757 | **] |
| 誤差 | 20  | 8.158680218 | 0.407934011 |             |             |     |

■ 検平均の差の検定と推定

| カテゴリ名1  | カテゴリ名2  | 平均1         | 平均2         | 差            | 統計量         | 5%点    | 1%点    | 判定  | 信頼水準95%      | 信頼水準99%     |              |             |
|---------|---------|-------------|-------------|--------------|-------------|--------|--------|-----|--------------|-------------|--------------|-------------|
| コントロール  | 1g/kg   | 2.64696833  | 1.964132167 | 0.682836166  | 2.618686495 | 3.9583 | 5.0178 | [ ] | -0.349300212 | 1.714929546 | -0.625561667 | 1.991191    |
| コントロール  | 1.5g/kg | 2.64696833  | 1.179457    | 1.467498833  | 5.628021769 | 3.9583 | 5.0178 | **] | 0.435374954  | 2.499604712 | 0.1591135    | 2.775866167 |
| コントロール  | 2 g/kg  | 2.64696833  | 1.434381833 | 1.2125865    | 4.650350593 | 3.9583 | 5.0178 | *]  | 0.180450121  | 2.244679879 | -0.09581333  | 2.520941333 |
| 1g/kg   | 1.5g/kg | 1.964132167 | 1.179457    | 0.784675167  | 3.009335274 | 3.9583 | 5.0178 | [ ] | -0.247439712 | 1.816790046 | -0.523701167 | 2.0930515   |
| 1g/kg   | 2 g/kg  | 1.964132167 | 1.434381833 | 0.529750333  | 2.031664098 | 3.9583 | 5.0178 | [ ] | -0.529284546 | 1.561865212 | -0.778626    | 1.838126867 |
| 1.5g/kg | 2 g/kg  | 1.179457    | 1.434381833 | -0.254924833 | 0.977671176 | 3.9583 | 5.0178 | [ ] | -1.287039712 | 0.777190046 | -1.563301167 | 1.0524515   |

● 検平均: F-値 (金網比較)

■ 基本統計量

| カテゴリ名   | n | 合計          | 平均          | 分散(n-1)     |
|---------|---|-------------|-------------|-------------|
| コントロール  | 6 | 11.20326666 | 1.867211108 | 0.043812208 |
| 1g/kg   | 6 | 11.8329101  | 1.98881835  | 0.046310881 |
| 1.5g/kg | 6 | 12.1162276  | 2.019372933 | 0.101024089 |
| 2 g/kg  | 6 | 11.78891465 | 1.964985775 | 0.092382999 |

■ 等分散性の検定 (バートレット)

| 分布  | カイニ乗分布      |
|-----|-------------|
| 自由度 | 3           |
| 統計量 | 1.261579233 |
| 1%点 | 11.34466673 |
| 5%点 | 7.814727903 |
| p値  | 0.738276045 |
| 判定  | [ ]         |

■ 分散分析表

| 要因 | 自由度 | 偏差平方和       | 不偏分散        | 分散比         | p値         | 判定  |
|----|-----|-------------|-------------|-------------|------------|-----|
| 全体 | 23  | 1.505582333 |             |             |            |     |
| A  | 3   | 0.077941447 | 0.025980482 | 0.363961283 | 0.77972022 | [ ] |
| 誤差 | 20  | 1.427650886 | 0.071382544 |             |            |     |

■ 検平均の差の検定と推定

| カテゴリ名1  | カテゴリ名2  | 平均1         | 平均2         | 差            | 統計量         | 5%点    | 1%点    | 判定  | 信頼水準95%      | 信頼水準99%     |              |             |
|---------|---------|-------------|-------------|--------------|-------------|--------|--------|-----|--------------|-------------|--------------|-------------|
| コントロール  | 1g/kg   | 1.867211108 | 1.98881835  | -0.121607242 | 1.114909005 | 3.9583 | 5.0178 | [ ] | -0.533354007 | 0.310139624 | -0.668917685 | 0.4257032   |
| コントロール  | 1.5g/kg | 1.867211108 | 2.019372933 | -0.152161825 | 1.395035701 | 3.9583 | 5.0178 | [ ] | -0.593988591 | 0.279584941 | -0.699472267 | 0.395146817 |
| コントロール  | 2 g/kg  | 1.867211108 | 1.964985775 | -0.097774667 | 0.896409482 | 2.9583 | 5.0178 | [ ] | -0.529521432 | 0.323092099 | -0.649056109 | 0.448635776 |
| 1g/kg   | 1.5g/kg | 1.98881835  | 2.019372933 | -0.030554583 | 0.280127651 | 3.9583 | 5.0178 | [ ] | -0.462301349 | 0.401102152 | -0.577865025 | 0.516755858 |
| 1g/kg   | 2 g/kg  | 1.98881835  | 1.964985775 | 0.023832575  | 0.215499568 | 3.9583 | 5.0178 | [ ] | -0.407914191 | 0.455579341 | -0.523477867 | 0.571140017 |
| 1.5g/kg | 2 g/kg  | 2.019372933 | 1.964985775 | 0.054387158  | 0.488627218 | 3.9583 | 5.0178 | [ ] | -0.377359607 | 0.486133924 | -0.492923283 | 0.6016976   |

● 検平均: F-値 (金網比較)

■ 基本統計量

| カテゴリ名   | n | 合計         | 平均          | 分散(n-1)     |
|---------|---|------------|-------------|-------------|
| コントロール  | 6 | 1.97319556 | 0.328866593 | 0.001844998 |
| 1g/kg   | 6 | 2.14387492 | 0.357279153 | 0.005268906 |
| 1.5g/kg | 6 | 1.92412332 | 0.32068722  | 0.006493382 |
| 2 g/kg  | 6 | 2.25990812 | 0.376651353 | 0.006498497 |

■ 等分散性の検定 (バートレット)

| 分布  | カイニ乗分布      |
|-----|-------------|
| 自由度 | 3           |
| 統計量 | 2.040909395 |
| 1%点 | 11.34466673 |
| 5%点 | 7.814727903 |
| p値  | 0.563959369 |
| 判定  | [ ]         |

■ 分散分析表

| 要因 | 自由度 | 偏差平方和       | 不偏分散        | 分散比         | p値          | 判定  |
|----|-----|-------------|-------------|-------------|-------------|-----|
| 全体 | 23  | 0.112534602 |             |             |             |     |
| A  | 3   | 0.012005692 | 0.004001897 | 0.796168481 | 0.510409232 | [ ] |
| 誤差 | 20  | 0.10052891  | 0.005026445 |             |             |     |

■ 検平均の差の検定と推定

| カテゴリ名1  | カテゴリ名2  | 平均1         | 平均2         | 差            | 統計量         | 5%点    | 1%点    | 判定  | 信頼水準95%      | 信頼水準99%     |              |             |
|---------|---------|-------------|-------------|--------------|-------------|--------|--------|-----|--------------|-------------|--------------|-------------|
| コントロール  | 1g/kg   | 0.328866593 | 0.357279153 | -0.02841256  | 0.981647359 | 3.9583 | 5.0178 | [ ] | -0.142980623 | 0.096155503 | -0.193646531 | 0.116821411 |
| コントロール  | 1.5g/kg | 0.328866593 | 0.32068722  | 0.008179373  | 0.282595452 | 3.9583 | 5.0178 | [ ] | -0.103688689 | 0.122747436 | -0.137054959 | 0.153413444 |
| コントロール  | 2 g/kg  | 0.328866593 | 0.376651353 | -0.04778467  | 1.650952376 | 3.9583 | 5.0178 | [ ] | -0.162328223 | 0.066783303 | -0.193018731 | 0.094749211 |
| 1g/kg   | 1.5g/kg | 0.357279153 | 0.32068722  | 0.036591933  | 1.264242811 | 3.9583 | 5.0178 | [ ] | -0.077976129 | 0.151159996 | -0.108642037 | 0.181825904 |
| 1g/kg   | 2 g/kg  | 0.357279153 | 0.376651353 | -0.0193722   | 0.669305017 | 3.9583 | 5.0178 | [ ] | -0.133940283 | 0.095195863 | -0.164606171 | 0.125861771 |
| 1.5g/kg | 2 g/kg  | 0.32068722  | 0.376651353 | -0.055964133 | 1.933547828 | 3.9583 | 5.0178 | [ ] | -0.17052196  | 0.058603929 | -0.201198104 | 0.089269883 |
